# Supplementary material for: BRAF and MEK Inhibitors and Their Toxicities: A Meta-Analysis
Source: MDPI journal article supplement (doi:10.3390/cancers15010141), 2022-12-26
Supplement: s1 [file s1]

## Supplementary materials

**Table S1-**The 91 studies included in the meta-analysis.

| Study PMID | Year | Study type<br>(1=retrospective<br>2=prospective) | Study phase<br>(1,2,3,4, real world) | Study size | Drug |
|------------|------|--------------------------------------------------|--------------------------------------|------------|------|
| 21639808   | 2011 | 2                                                | 3                                    | 337        | V    |
| 22735384   | 2012 | 2                                                | 3                                    | 187        | D    |
| 23020132   | 2012 | 2                                                | 1-2                                  | 54         | D    |
|            | 2012 | 2                                                | 1-2                                  | 54         | DT   |
|            | 2012 | 2                                                | 1-2                                  | 54         | DT   |
| 22663011   | 2012 | 2                                                | 3                                    | 214        | T    |
| 22356324   | 2012 | 2                                                | 2                                    | 132        | V    |
| 23051966   | 2012 | 2                                                | 2                                    | 89         | D    |
|            | 2012 | 2                                                | 2                                    | 83         | D    |
| 22805291   | 2012 | 2                                                | 1                                    | 70         | T    |
| 22805292   | 2012 | 2                                                | 1                                    | 26         | T    |
| 23248257   | 2013 | 2                                                | 2                                    | 97         | T    |
| 23414587   | 2013 | 2                                                | 2                                    | 30         | B    |
|            | 2013 | 2                                                | 2                                    | 41         | B    |
| 23918947   | 2013 | 2                                                | 2                                    | 92         | D    |
| 24445759   | 2014 | 2                                                | 4                                    | 371        | V    |
| 24241686   | 2014 | 1                                                | real world                           | 50         | V    |
| 25037139   | 2014 | 2                                                | 1-2                                  | 66         | VC   |
|            | 2014 | 2                                                | 1-2                                  | 63         | VC   |
| 25287827   | 2014 | 2                                                | 1-2                                  | 26         | DT   |
|            | 2014 | 2                                                | 1-2                                  | 45         | DT   |
| 24582505   | 2014 | 2                                                | 2                                    | 3222       | V    |
| 24508103   | 2014 | 2                                                | 3                                    | 335        | V    |
| 24295639   | 2014 | 2                                                | 3                                    | 24         | V    |
| 25265492   | 2014 | 2                                                | 3                                    | 211        | DT   |
|            | 2014 | 2                                                | 3                                    | 212        | D    |
| 25265494   | 2014 | 2                                                | 3                                    | 247        | VC   |
|            | 2014 | 2                                                | 3                                    | 248        | V    |
| 25399551   | 2015 | 2                                                | 3                                    | 352        | V    |
|            | 2015 | 2                                                | 3                                    | 352        | DT   |
| 26037941   | 2015 | 2                                                | 3                                    | 211        | DT   |
|            | 2015 | 2                                                | 3                                    | 212        | D    |
| 26352686   | 2015 | 2                                                | 2                                    | 28         | V    |
|            | 2015 | 2                                                | 2                                    | 26         | V    |
| 26460303   | 2015 | 2                                                | 2                                    | 21         | V    |
| 25722381   | 2015 | 2                                                | 2                                    | 86         | T    |
| 25956405   | 2015 | 1                                                | -                                    | 27         | V    |

| 26287849   | 2015 | 2                                                | 2                                    | 20         | V    |
|------------|------|--------------------------------------------------|--------------------------------------|------------|------|
| 26392102   | 2015 | 2                                                | 2                                    | 43         | DT   |
| Study PMID | Year | Study type<br>(1=retrospective<br>2=prospective) | Study phase<br>(1,2,3,4, real world) | Study size | Drug |
| 24661317   | 2015 | 2                                                | real world                           | 19         | V    |
| 25952781   | 2015 | 2                                                | real world                           | 385        | V    |
| 26557775   | 2015 | 2                                                | real world                           | 75         | V    |
| 27080216   | 2016 | 2                                                | 2                                    | 84         | D    |
| 27283860   | 2016 | 2                                                | 2                                    | 57         | DT   |
| 27460442   | 2016 | 2                                                | 2                                    | 26         | V    |
|            | 2016 | 2                                                | 2                                    | 25         | V    |
| 26208946   | 2016 | 2                                                | real world                           | 59         | V    |
| 26981153   | 2016 | 2                                                | real world                           | 40         | D    |
| 26983408   | 2016 | 2                                                | 3                                    | 301        | V    |
| 27071922   | 2016 | 2                                                | 1                                    | 21         | B    |
| 27470608   | 2016 | 1                                                | -                                    | 48         | DT   |
| 27480103   | 2016 | 2                                                | 3                                    | 247        | VC   |
|            | 2016 | 2                                                | 3                                    | 248        | V    |
| 28151720   | 2017 | 2                                                | 2                                    | 20         | T    |
| 27993793   | 2017 | 2                                                | 2                                    | 146        | V    |
| 28268064   | 2017 | 2                                                | 2                                    | 25         | DT   |
| 28592387   | 2017 | 2                                                | 2                                    | 76         | DT   |
|            | 2017 | 2                                                | 2                                    | 16         | DT   |
|            | 2017 | 2                                                | 2                                    | 16         | DT   |
|            | 2017 | 2                                                | 2                                    | 16         | DT   |
|            | 2017 | 2                                                | 2                                    | 17         | DT   |
| 28919011   | 2017 | 2                                                | 2                                    | 36         | DT   |
| 29121415   | 2017 | 2                                                | 2                                    | 20         | T    |
| 28444112   | 2017 | 2                                                | 3                                    | 246        | V    |
|            | 2017 | 2                                                | 3                                    | 247        | VC   |
| 28475671   | 2017 | 2                                                | 3                                    | 209        | DT   |
|            | 2017 | 2                                                | 3                                    | 211        | D    |
| 28284557   | 2017 | 2                                                | 3                                    | 269        | B    |
| 28891408   | 2017 | 2                                                | 3                                    | 438        | DT   |
| 28152546   | 2017 | 2                                                | 1                                    | 44         | B    |
| 28501764   | 2017 | 2                                                | 4                                    | 3219       | V    |
| 28567600   | 2017 | 1                                                | -                                    | 30         | D    |
| 28611198   | 2017 | 2                                                | 1                                    | 35         | E    |
| 28963614   | 2017 | 1                                                | -                                    | 43         | V    |
| 29285228   | 2017 | 2                                                | 3                                    | 21         | D    |
| 29076950   | 2017 | 2                                                | 2                                    | 31         | V    |
| 29384960   | 2017 | 1                                                | -                                    | 48         | D    |
|            | 2017 | 1                                                | -                                    | 87         | DT   |

| Study PMID | Year | Study type<br>(1=retrospective<br>2=prospective) | Study phase<br>(1,2,3,4, real world) | Study size | Drug |
|------------|------|--------------------------------------------------|--------------------------------------|------------|------|
| 29477665   | 2018 | 2                                                | 3                                    | 247        | V    |
|            | 2018 | 2                                                | 3                                    | 192        | EB   |
| 29573941   | 2018 | 2                                                | 3                                    | 194        | E    |
|            | 2018 | 2                                                | 3                                    | 191        | V    |
|            | 2018 | 2                                                | 3                                    | 192        | EB   |
| 30219628   | 2018 | 2                                                | 3                                    | 194        | E    |
|            | 2018 | 2                                                | 3                                    | 191        | V    |
| 30343620   | 2018 | 2                                                | 3                                    | 438        | DT   |
| 29724167   | 2018 | 2                                                | 1                                    | 46         | V    |
| 29785570   | 2018 | 2                                                | 1                                    | 28         | B    |
| 30081673   | 2018 | 1                                                | -                                    | 76         | DT   |
| 29438093   | 2018 | 2                                                | 2                                    | 93         | DT   |
| 29188284   | 2018 | 2                                                | 2                                    | 26         | V    |
| 30351999   | 2018 | 2                                                | 2                                    | 24         | V    |
| 30690294   | 2019 | 2                                                | 3                                    | 214        | T    |
|            | 2019 | 2                                                | 3                                    | 192        | EB   |
| 31437754   | 2019 | 2                                                | 3                                    | 192        | E    |
|            | 2019 | 2                                                | 3                                    | 186        | V    |
| 30580112   | 2019 | 2                                                | real world                           | 3219       | V    |
|            | 2019 | 2                                                | 1                                    | 63         | VC   |
| 31732523   | 2019 | 2                                                | 1                                    | 66         | VC   |
|            | 2019 | 2                                                | real world                           | 139        | D    |
| 30386910   | 2019 | 2                                                | real world                           | 698        | V    |
| 31876308   | 2019 | 2                                                | real world                           | 50         | DT   |
| 31171444   | 2019 | 2                                                | 2                                    | 35         | DT   |
| 32914022   | 2019 | 2                                                | 2                                    | 62         | V    |
|            | 2020 | 2                                                | 3                                    | 192        | EB   |
| 31901705   | 2020 | 2                                                | 3                                    | 192        | E    |
|            | 2020 | 2                                                | 3                                    | 186        | V    |
| 32822286   | 2020 | 2                                                | 3                                    | 201        | B    |
| 32234665   | 2020 | 2                                                | 2                                    | 24         | T    |
| 32534242   | 2020 | 2                                                | 2                                    | 77         | DT   |
| 32818466   | 2020 | 2                                                | 2                                    | 43         | DT   |
|            | 2020 | 2                                                | 2                                    | 104        | DT   |
| 33020646   | 2020 | 2                                                | 2                                    | 101        | DT   |
| 33361337   | 2020 | 2                                                | 2                                    | 60         | DT   |
| 32699976   | 2020 | 2                                                | real world                           | 112        | DT   |
| 31895752   | 2020 | 1                                                | -                                    | 271        | DT   |
| 32534646   | 2020 | 2                                                | 3                                    | 281        | VC   |
| 32758030   | 2020 | 2                                                | 3                                    | 35         | DT   |

| <b>Study PMID</b> | <b>Year</b> | <b>Study type<br/>(1= retrospective<br/>2=prospective)</b> | <b>Study phase<br/>(1,2,3,4, real world)</b> | <b>Study size</b> | <b>Drug</b> |
|-------------------|-------------|------------------------------------------------------------|----------------------------------------------|-------------------|-------------|
| 32875931          | 2020        | 1                                                          | -                                            | 62                | V           |
| 34158360          | 2021        | 2                                                          | 3                                            | 248               | V           |
|                   | 2021        | 2                                                          | 3                                            | 247               | VC          |
| 34455067          | 2021        | 2                                                          | 2                                            | 93                | DT          |
| 33637626          | 2021        | 2                                                          | 2                                            | 50                | B           |

**Table S2**-Evaluation of the bias risk according to Risk Of Bias In Non-randomized Studies of Interventions guidelines (ROBINS I). (Sterne JAC, Higgins JPT, Elbers RG, Reeves BC and the development group for ROBINS-I. *“Risk Of Bias In Non-randomized Studies of Interventions (ROBINS-I): detailed guidance”*. Updated 12 October 2016. <http://www.riskofbias.info>)

| <b>BIAS DUE TO CONFOUNDING</b> |             |            |            |            |            |            |            |            |            |                   |
|--------------------------------|-------------|------------|------------|------------|------------|------------|------------|------------|------------|-------------------|
| <b>Study PMID</b>              | <b>Year</b> | <b>1.1</b> | <b>1.2</b> | <b>1.3</b> | <b>1.4</b> | <b>1.5</b> | <b>1.6</b> | <b>1.7</b> | <b>1.8</b> | <b>Bias level</b> |
| 21639808                       | 2011        | N          | NA         | Low               |
| 22356324                       | 2012        | N          | NA         | Low               |
| 22663011                       | 2012        | N          | NA         | Low               |
| 22735384                       | 2012        | N          | NA         | Low               |
| 23051966                       | 2012        | N          | NA         | Low               |
| 22805291                       | 2012        | N          | NA         | Low               |
| 23020132                       | 2012        | N          | NA         | Low               |
| 22805292                       | 2012        | N          | NA         | Low               |
| 23248257                       | 2013        | PN         | NA         | Low               |
| 23406731                       | 2013        | PN         | NA         | Low               |
| 23414587                       | 2013        | PN         | NA         | Low               |
| 23918947                       | 2013        | PN         | NA         | Low               |
| 24295639                       | 2014        | N          | NA         | Low               |
| 24445759                       | 2014        | N          | NA         | Low               |
| 24508103                       | 2014        | N          | NA         | Low               |
| 24241686                       | 2014        | PN         | NA         | Low               |
| 24582505                       | 2014        | PN         | NA         | Low               |
| 25037139                       | 2014        | N          | NA         | Low               |
| 25265492                       | 2014        | N          | NA         | Low               |
| 25265494                       | 2014        | N          | NA         | Low               |
| 25287827                       | 2014        | N          | NA         | Low               |
| 25399551                       | 2015        | N          | NA         | Low               |
| 24661317                       | 2015        | PN         | NA         | Low               |
| 25952781                       | 2015        | PN         | NA         | Low               |
| 26557775                       | 2015        | PN         | NA         | Low               |
| 25722381                       | 2015        | PN         | NA         | Low               |
| 25956405                       | 2015        | N          | NA         | Low               |
| 26037941                       | 2015        | N          | NA         | Low               |
| 26287849                       | 2015        | PN         | NA         | Low               |
| 26352686                       | 2015        | N          | NA         | Low               |
| 26392102                       | 2015        | N          | NA         | Low               |
| 26109403                       | 2015        | PN         | NA         | Low               |
| 26460303                       | 2015        | PN         | NA         | Low               |
| 26208946                       | 2016        | PN         | NA         | Low               |
| 26981153                       | 2016        | PN         | NA         | Low               |
| 26983408                       | 2016        | PN         | NA         | Low               |
| <b>Study PMID</b>              | <b>Year</b> | <b>1.1</b> | <b>1.2</b> | <b>1.3</b> | <b>1.4</b> | <b>1.5</b> | <b>1.6</b> | <b>1.7</b> | <b>1.8</b> | <b>Bias level</b> |

|                   |             |            |            |            |            |            |            |            |            |                   |
|-------------------|-------------|------------|------------|------------|------------|------------|------------|------------|------------|-------------------|
| 27080216          | 2016        | PN         | NA         | Low               |
| 27071922          | 2016        | N          | NA         | Low               |
| 27283860          | 2016        | PN         | NA         | Low               |
| 27460442          | 2016        | PN         | NA         | Low               |
| 27470608          | 2016        | PN         | NA         | Low               |
| 27480103          | 2016        | N          | NA         | Low               |
| 28151720          | 2017        | PN         | NA         | Low               |
| 28152546          | 2017        | N          | NA         | Low               |
| 27993793          | 2017        | PN         | NA         | Low               |
| 28284557          | 2017        | N          | NA         | Low               |
| 28444112          | 2017        | N          | NA         | Low               |
| 28268064          | 2017        | PN         | NA         | Low               |
| 28501764          | 2017        | PN         | NA         | Low               |
| 28592387          | 2017        | PN         | NA         | Low               |
| 28567600          | 2017        | PN         | NA         | Low               |
| 28611198          | 2017        | N          | NA         | Low               |
| 28475671          | 2017        | PN         | NA         | Low               |
| 28891408          | 2017        | N          | NA         | Low               |
| 28919011          | 2017        | PN         | NA         | Low               |
| 28963614          | 2017        | PN         | NA         | Low               |
| 29285228          | 2017        | PN         | NA         | Low               |
| 29076950          | 2017        | PN         | NA         | Low               |
| 29384960          | 2017        | PN         | NA         | Low               |
| 29121415          | 2017        | PN         | NA         | Low               |
| 29477665          | 2018        | N          | NA         | Low               |
| 29188284          | 2018        | PN         | NA         | Low               |
| 29573941          | 2018        | N          | NA         | Low               |
| 29724167          | 2018        | N          | NA         | Low               |
| 29785570          | 2018        | N          | NA         | Low               |
| 30219628          | 2018        | N          | NA         | Low               |
| 30081673          | 2018        | PN         | NA         | Low               |
| 29438093          | 2018        | PN         | NA         | Low               |
| 30343620          | 2018        | N          | NA         | Low               |
| 30351999          | 2018        | N          | NA         | Low               |
| 30468696          | 2019        | PN         | NA         | Low               |
| 30580112          | 2019        | PN         | NA         | Low               |
| 30690294          | 2019        | N          | NA         | Low               |
| 31171444          | 2019        | PN         | NA         | Low               |
| 32914022          | 2019        | PN         | NA         | Low               |
| 31437754          | 2019        | N          | NA         | Low               |
| 31732523          | 2019        | N          | NA         | Low               |
| 30386910          | 2019        | N          | NA         | Low               |
| <b>Study PMID</b> | <b>Year</b> | <b>1.1</b> | <b>1.2</b> | <b>1.3</b> | <b>1.4</b> | <b>1.5</b> | <b>1.6</b> | <b>1.7</b> | <b>1.8</b> | <b>Bias level</b> |

|          |      |    |    |    |    |    |    |    |    |     |
|----------|------|----|----|----|----|----|----|----|----|-----|
| 31876308 | 2019 | PN | NA | Low |
| 31901705 | 2020 | N  | NA | Low |
| 32234665 | 2020 | PN | NA | Low |
| 31895752 | 2020 | PN | NA | Low |
| 32534242 | 2020 | PN | NA | Low |
| 32534646 | 2020 | PN | NA | Low |
| 32818466 | 2020 | PN | NA | Low |
| 32822286 | 2020 | N  | NA | Low |
| 33020646 | 2020 | PN | NA | Low |
| 32758030 | 2020 | PN | NA | Low |
| 32875931 | 2020 | PN | NA | Low |
| 32699976 | 2020 | PN | NA | Low |
| 33361337 | 2020 | PN | NA | Low |
| 33637626 | 2021 | N  | NA | Low |
| 34455067 | 2021 | PN | NA | Low |
| 34243078 | 2021 | N  | NA | Low |
| 34158360 | 2021 | N  | NA | Low |

**BIAS IN SELECTION OF PARTICIPANTS INTO THE STUDY**

| <b>Study PMID</b> | <b>Year</b> | <b>2.1</b> | <b>2.2</b> | <b>2.3</b> | <b>2.4</b> | <b>2.5</b> | <b>Bias level</b> |
|-------------------|-------------|------------|------------|------------|------------|------------|-------------------|
| 21639808          | 2011        | N          | NA         | NA         | Y          | NA         | Low               |
| 22356324          | 2012        | N          | NA         | NA         | PY         | NA         | Low               |
| 22663011          | 2012        | N          | NA         | NA         | PY         | NA         | Low               |
| 22735384          | 2012        | N          | NA         | NA         | Y          | NA         | Low               |
| 23051966          | 2012        | N          | NA         | NA         | Y          | NA         | Low               |
| 22805291          | 2012        | PN         | NA         | NA         | PY         | NA         | Low               |
| 23020132          | 2012        | N          | NA         | NA         | Y          | NA         | Low               |
| 22805292          | 2012        | PN         | NA         | NA         | PY         | NA         | Low               |
| 23248257          | 2013        | N          | NA         | NA         | Y          | NA         | Low               |
| 23406731          | 2013        | N          | NA         | NA         | Y          | NA         | Low               |
| 23414587          | 2013        | PN         | NA         | NA         | PY         | NA         | Low               |
| 23918947          | 2013        | PN         | NA         | NA         | PY         | NA         | Low               |
| 24295639          | 2014        | N          | NA         | NA         | Y          | NA         | Low               |
| 24445759          | 2014        | N          | NA         | NA         | PY         | NA         | Low               |
| 24508103          | 2014        | N          | NA         | NA         | Y          | NA         | Low               |
| 24241686          | 2014        | N          | NA         | NA         | Y          | NA         | Low               |
| 24582505          | 2014        | N          | NA         | NA         | PY         | NA         | Low               |
| 25037139          | 2014        | PN         | NA         | NA         | PY         | NA         | Low               |
| 25265492          | 2014        | N          | NA         | NA         | Y          | NA         | Low               |
| 25265494          | 2014        | N          | NA         | NA         | Y          | NA         | Low               |
| 25287827          | 2014        | N          | NA         | NA         | Y          | NA         | Low               |
| 25399551          | 2015        | N          | NA         | NA         | Y          | NA         | Low               |
| 24661317          | 2015        | N          | NA         | NA         | Y          | NA         | Low               |
| 25952781          | 2015        | N          | NA         | NA         | Y          | NA         | Low               |
| 26557775          | 2015        | N          | NA         | NA         | Y          | NA         | Low               |
| 25722381          | 2015        | PN         | NA         | NA         | PY         | NA         | Low               |
| 25956405          | 2015        | N          | NA         | NA         | Y          | NA         | Low               |
| 26037941          | 2015        | N          | NA         | NA         | PY         | NA         | Low               |
| 26287849          | 2015        | N          | NA         | NA         | Y          | NA         | Low               |
| 26352686          | 2015        | PN         | NA         | NA         | PY         | NA         | Low               |
| 26392102          | 2015        | N          | NA         | NA         | PY         | NA         | Low               |
| 26109403          | 2015        | PN         | NA         | NA         | Y          | NA         | Low               |
| 26460303          | 2015        | PN         | NA         | NA         | PY         | NA         | Low               |
| 26208946          | 2016        | N          | NA         | NA         | PY         | NA         | Low               |
| 26981153          | 2016        | N          | NA         | NA         | Y          | NA         | Low               |
| 26983408          | 2016        | PN         | NA         | NA         | PY         | NA         | Low               |
| 27080216          | 2016        | PN         | NA         | NA         | PY         | NA         | Low               |
| 27071922          | 2016        | PN         | NA         | NA         | PY         | NA         | Low               |
| 27283860          | 2016        | PN         | NA         | NA         | PY         | NA         | Low               |
| 27460442          | 2016        | PN         | NA         | NA         | PY         | NA         | Low               |



|                   |             |            |            |            |            |            |                   |
|-------------------|-------------|------------|------------|------------|------------|------------|-------------------|
| 27470608          | 2016        | N          | NA         | NA         | Y          | NA         | Low               |
| 27480103          | 2016        | N          | NA         | NA         | Y          | NA         | Low               |
| 28151720          | 2017        | PN         | NA         | NA         | PY         | NA         | Low               |
| 28152546          | 2017        | PN         | NA         | NA         | PY         | NA         | Low               |
| 27993793          | 2017        | PN         | NA         | NA         | PY         | NA         | Low               |
| 28284557          | 2017        | N          | NA         | NA         | Y          | NA         | Low               |
| 28444112          | 2017        | N          | NA         | NA         | Y          | NA         | Low               |
| 28268064          | 2017        | PN         | NA         | NA         | PY         | NA         | Low               |
| 28501764          | 2017        | N          | NA         | NA         | Y          | NA         | Low               |
| 28592387          | 2017        | PN         | NA         | NA         | PY         | NA         | Low               |
| 28567600          | 2017        | N          | NA         | NA         | Y          | NA         | Low               |
| 28611198          | 2017        | PN         | NA         | NA         | PY         | NA         | Low               |
| 28475671          | 2017        | N          | NA         | NA         | Y          | NA         | Low               |
| 28891408          | 2017        | N          | NA         | NA         | PY         | NA         | Low               |
| 28919011          | 2017        | PN         | NA         | NA         | PY         | NA         | Low               |
| 28963614          | 2017        | N          | NA         | NA         | Y          | NA         | Low               |
| 29285228          | 2017        | PN         | NA         | NA         | PY         | NA         | Low               |
| 29076950          | 2017        | PN         | NA         | NA         | PY         | NA         | Low               |
| 29384960          | 2017        | N          | NA         | NA         | Y          | NA         | Low               |
| 29121415          | 2017        | PN         | NA         | NA         | PY         | NA         | Low               |
| 29477665          | 2018        | N          | NA         | NA         | Y          | NA         | Low               |
| 29188284          | 2018        | PN         | NA         | NA         | PY         | NA         | Low               |
| 29573941          | 2018        | N          | NA         | NA         | Y          | NA         | Low               |
| 29724167          | 2018        | PN         | NA         | NA         | PY         | NA         | Low               |
| 29785570          | 2018        | PN         | NA         | NA         | PY         | NA         | Low               |
| 30219628          | 2018        | N          | NA         | NA         | Y          | NA         | Low               |
| 30081673          | 2018        | N          | NA         | NA         | Y          | NA         | Low               |
| 29438093          | 2018        | PN         | NA         | NA         | PY         | NA         | Low               |
| 30343620          | 2018        | N          | NA         | NA         | Y          | NA         | Low               |
| 30351999          | 2018        | PN         | NA         | NA         | PY         | NA         | Low               |
| 30468696          | 2019        | N          | NA         | NA         | Y          | NA         | Low               |
| 30580112          | 2019        | N          | NA         | NA         | PY         | NA         | Low               |
| 30690294          | 2019        | N          | NA         | NA         | Y          | NA         | Low               |
| 31171444          | 2019        | PN         | NA         | NA         | PY         | NA         | Low               |
| 32914022          | 2019        | PN         | NA         | NA         | PY         | NA         | Low               |
| 31437754          | 2019        | N          | NA         | NA         | Y          | NA         | Low               |
| 31732523          | 2019        | PN         | NA         | NA         | PY         | NA         | Low               |
| 30386910          | 2019        | N          | NA         | NA         | PY         | NA         | Low               |
| 31876308          | 2019        | N          | NA         | NA         | Y          | NA         | Low               |
| 31901705          | 2020        | N          | NA         | NA         | Y          | NA         | Low               |
| 32234665          | 2020        | PN         | NA         | NA         | PY         | NA         | Low               |
| 31895752          | 2020        | PN         | NA         | NA         | PY         | NA         | Low               |
| <b>Study PMID</b> | <b>Year</b> | <b>2.1</b> | <b>2.2</b> | <b>2.3</b> | <b>2.4</b> | <b>2.5</b> | <b>Bias level</b> |

|          |      |    |    |    |    |    |     |
|----------|------|----|----|----|----|----|-----|
| 32534242 | 2020 | PN | NA | NA | PY | NA | Low |
| 32534646 | 2020 | PN | NA | NA | PY | NA | Low |
| 32818466 | 2020 | PN | NA | NA | PY | NA | Low |
| 32822286 | 2020 | N  | NA | NA | Y  | NA | Low |
| 33020646 | 2020 | PN | NA | NA | PY | NA | Low |
| 32758030 | 2020 | PN | NA | NA | PY | NA | Low |
| 32875931 | 2020 | PN | NA | NA | PY | NA | Low |
| 32699976 | 2020 | N  | NA | NA | Y  | NA | Low |
| 33361337 | 2020 | PN | NA | NA | PY | NA | Low |
| 33637626 | 2021 | PN | NA | NA | PY | NA | Low |
| 34455067 | 2021 | PN | NA | NA | PY | NA | Low |
| 34243078 | 2021 | N  | NA | NA | Y  | NA | Low |
| 34158360 | 2021 | N  | NA | NA | Y  | NA | Low |

**BIAS IN CLASSIFICATIONS OF INTERVENTIONS**

| <b>Study PMID</b> | <b>Year</b> | <b>3.1</b> | <b>3.2</b> | <b>3.3</b> | <b>Bias level</b> |
|-------------------|-------------|------------|------------|------------|-------------------|
| 21639808          | 2011        | Y          | Y          | N          | Low               |
| 22356324          | 2012        | NI         | NI         | PN         | Low               |
| 22663011          | 2012        | Y          | Y          | N          | Low               |
| 22735384          | 2012        | Y          | Y          | N          | Low               |
| 23051966          | 2012        | Y          | Y          | N          | Low               |
| 22805291          | 2012        | Y          | Y          | PN         | Low               |
| 23020132          | 2012        | Y          | Y          | N          | Low               |
| 22805292          | 2012        | PY         | Y          | PN         | Low               |
| 23248257          | 2013        | Y          | Y          | N          | Low               |
| 23406731          | 2013        | Y          | Y          | N          | Low               |
| 23414587          | 2013        | PY         | PY         | PN         | Low               |
| 23918947          | 2013        | PY         | PY         | PN         | Low               |
| 24295639          | 2014        | Y          | Y          | N          | Low               |
| 24445759          | 2014        | NI         | NI         | PN         | Low               |
| 24508103          | 2014        | Y          | Y          | N          | Low               |
| 24241686          | 2014        | Y          | Y          | PN         | Low               |
| 24582505          | 2014        | Y          | Y          | PN         | Low               |
| 25037139          | 2014        | Y          | Y          | PN         | Low               |
| 25265492          | 2014        | Y          | Y          | N          | Low               |
| 25265494          | 2014        | Y          | Y          | N          | Low               |
| 25287827          | 2014        | Y          | Y          | PN         | Low               |
| 25399551          | 2015        | Y          | Y          | N          | Low               |
| 24661317          | 2015        | NI         | NI         | PN         | Low               |
| 25952781          | 2015        | Y          | Y          | PN         | Low               |
| 26557775          | 2015        | NI         | NI         | PN         | Low               |
| 25722381          | 2015        | Y          | Y          | PN         | Low               |
| 25956405          | 2015        | Y          | Y          | PN         | Low               |
| 26037941          | 2015        | Y          | Y          | N          | Low               |
| 26287849          | 2015        | NI         | NI         | PN         | Low               |
| 26352686          | 2015        | PY         | PY         | PN         | Low               |
| 26392102          | 2015        | PY         | PY         | PN         | Low               |
| 26109403          | 2015        | Y          | PY         | PN         | Low               |
| 26460303          | 2015        | PY         | PY         | PN         | Low               |
| 26208946          | 2016        | PY         | Y          | PN         | Low               |
| 26981153          | 2016        | PY         | Y          | PN         | Low               |
| 26983408          | 2016        | PY         | PY         | PN         | Low               |
| 27080216          | 2016        | PY         | PY         | PN         | Low               |
| 27071922          | 2016        | PY         | PY         | PN         | Low               |
| 27283860          | 2016        | PY         | PY         | PN         | Low               |

|                   |             |            |            |            |                   |
|-------------------|-------------|------------|------------|------------|-------------------|
| 27460442          | 2016        | PY         | PY         | PN         | Low               |
| 27470608          | 2016        | Y          | Y          | PN         | Low               |
| 27480103          | 2016        | Y          | Y          | N          | Low               |
| 28151720          | 2017        | NI         | PY         | PN         | Low               |
| 28152546          | 2017        | Y          | Y          | PN         | Low               |
| 27993793          | 2017        | PY         | PY         | PN         | Low               |
| 28284557          | 2017        | Y          | Y          | N          | Low               |
| 28444112          | 2017        | Y          | Y          | N          | Low               |
| 28268064          | 2017        | PY         | PY         | PN         | Low               |
| 28501764          | 2017        | Y          | Y          | N          | Low               |
| 28592387          | 2017        | PY         | PY         | PN         | Low               |
| 28567600          | 2017        | Y          | Y          | PN         | Low               |
| 28611198          | 2017        | Y          | Y          | PN         | Low               |
| 28475671          | 2017        | Y          | Y          | PN         | Low               |
| 28891408          | 2017        | NI         | Y          | N          | Low               |
| 28919011          | 2017        | PY         | PY         | PN         | Low               |
| 28963614          | 2017        | Y          | Y          | PN         | Low               |
| 29285228          | 2017        | PY         | PY         | PN         | Low               |
| 29076950          | 2017        | PY         | PY         | PN         | Low               |
| 29384960          | 2017        | Y          | Y          | PN         | Low               |
| 29121415          | 2017        | PY         | PY         | PN         | Low               |
| 29477665          | 2018        | Y          | Y          | N          | Low               |
| 29188284          | 2018        | PY         | PY         | PN         | Low               |
| 29573941          | 2018        | Y          | PY         | N          | Low               |
| 29724167          | 2018        | Y          | Y          | PN         | Low               |
| 29785570          | 2018        | PY         | Y          | PN         | Low               |
| 30219628          | 2018        | Y          | Y          | N          | Low               |
| 30081673          | 2018        | Y          | PY         | N          | Low               |
| 29438093          | 2018        | PY         | Y          | PN         | Low               |
| 30343620          | 2018        | Y          | PY         | N          | Low               |
| 30351999          | 2018        | PY         | PY         | PN         | Low               |
| 30468696          | 2019        | Y          | Y          | N          | Low               |
| 30580112          | 2019        | Y          | Y          | PN         | Low               |
| 30690294          | 2019        | Y          | Y          | N          | Low               |
| 31171444          | 2019        | PY         | PY         | PN         | Low               |
| 32914022          | 2019        | PY         | PY         | PN         | Low               |
| 31437754          | 2019        | Y          | Y          | N          | Low               |
| 31732523          | 2019        | Y          | Y          | PN         | Low               |
| 30386910          | 2019        | Y          | Y          | PN         | Low               |
| 31876308          | 2019        | Y          | Y          | PN         | Low               |
| 31901705          | 2020        | Y          | Y          | N          | Low               |
| <b>Study PMID</b> | <b>Year</b> | <b>3.1</b> | <b>3.2</b> | <b>3.3</b> | <b>Bias level</b> |
| 32234665          | 2020        | PY         | PY         | PN         | Low               |

|          |      |    |    |    |     |
|----------|------|----|----|----|-----|
| 31895752 | 2020 | PY | PY | PN | Low |
| 32534242 | 2020 | PY | PY | PN | Low |
| 32534646 | 2020 | PY | PY | PN | Low |
| 32818466 | 2020 | PY | PY | PN | Low |
| 32822286 | 2020 | Y  | Y  | N  | Low |
| 33020646 | 2020 | PY | PY | PN | Low |
| 32758030 | 2020 | PY | PY | PN | Low |
| 32875931 | 2020 | PY | PY | PN | Low |
| 32699976 | 2020 | Y  | Y  | N  | Low |
| 33361337 | 2020 | PY | PY | PN | Low |
| 33637626 | 2021 | PY | PY | PN | Low |
| 34455067 | 2021 | PY | PY | PN | Low |
| 34243078 | 2021 | Y  | Y  | N  | Low |
| 34158360 | 2021 | Y  | Y  | N  | Low |

**BIAS DUE TO DEVIATIONS FROM INTENDED INTERVENTIONS**

| <b>Study PMID</b> | <b>Year</b> | <b>4.1</b> | <b>4.2</b> | <b>4.3</b> | <b>4.4</b> | <b>4.5</b> | <b>4.6</b> | <b>Bias level</b> |
|-------------------|-------------|------------|------------|------------|------------|------------|------------|-------------------|
| 21639808          | 2011        | N          | NA         | NI         | NI         | NI         | NA         | Low               |
| 22356324          | 2012        | N          | NA         | NI         | NI         | NI         | NA         | Low               |
| 22663011          | 2012        | N          | NA         | NI         | NI         | NI         | NA         | Low               |
| 22735384          | 2012        | N          | NA         | NI         | NI         | NI         | NA         | Low               |
| 23051966          | 2012        | N          | NA         | NA         | NA         | NA         | NA         | Low               |
| 22805291          | 2012        | NI         | NI         | NI         | PY         | Y          | NA         | Low               |
| 23020132          | 2012        | N          | NA         | NI         | NI         | NI         | NA         | Low               |
| 22805292          | 2012        | NI         | NI         | NI         | PY         | Y          | NA         | Low               |
| 23248257          | 2013        | PN         | NA         | NI         | NI         | NI         | NA         | Low               |
| 23406731          | 2013        | NI         | NA         | NI         | Y          | Y          | NA         | Low               |
| 23414587          | 2013        | PN         | NA         | NI         | NI         | NI         | NA         | Low               |
| 23918947          | 2013        | PN         | NA         | NI         | NI         | NI         | NA         | Low               |
| 24295639          | 2014        | N          | NA         | NI         | NI         | NI         | NA         | Low               |
| 24445759          | 2014        | N          | NA         | NI         | NI         | NI         | NA         | Low               |
| 24508103          | 2014        | N          | NA         | NI         | NI         | NI         | NA         | Low               |
| 24241686          | 2014        | NI         | NA         | NI         | PY         | PY         | NA         | Low               |
| 24582505          | 2014        | NI         | NA         | NI         | NI         | Y          | NA         | Low               |
| 25037139          | 2014        | NI         | NI         | NI         | PY         | Y          | NA         | Low               |
| 25265492          | 2014        | N          | NA         | NI         | NI         | NI         | NA         | Low               |
| 25265494          | 2014        | N          | NA         | NI         | NI         | NI         | NA         | Low               |
| 25287827          | 2014        | N          | NA         | PY         | PY         | PY         | NA         | Low               |
| 25399551          | 2015        | N          | NA         | NI         | NI         | NI         | NA         | Low               |
| 24661317          | 2015        | NI         | NA         | NI         | PY         | PY         | NA         | Low               |
| 25952781          | 2015        | N          | NA         | NI         | NI         | NI         | NA         | Low               |
| 26557775          | 2015        | NI         | NA         | NI         | PY         | PY         | NA         | Low               |
| 25722381          | 2015        | PN         | NA         | NI         | NI         | NI         | NI         | Low               |
| 25956405          | 2015        | NI         | NA         | NI         | PY         | PY         | NA         | Low               |
| 26037941          | 2015        | N          | NA         | NI         | NI         | NI         | NA         | Low               |
| 26287849          | 2015        | NI         | NA         | NI         | PY         | PY         | NA         | Low               |
| 26352686          | 2015        | PN         | NA         | NI         | NI         | NI         | NA         | Low               |
| 26392102          | 2015        | N          | NA         | PY         | PY         | PY         | NA         | Low               |
| 26109403          | 2015        | NI         | NA         | NI         | PY         | PY         | NA         | Low               |
| 26460303          | 2015        | PN         | NA         | NI         | NI         | NI         | NA         | Low               |
| 26208946          | 2016        | N          | NA         | NI         | NI         | NI         | NA         | Low               |
| 26981153          | 2016        | NI         | NA         | NI         | PY         | PY         | NA         | Low               |
| 26983408          | 2016        | PN         | NA         | PY         | PY         | PY         | NA         | Low               |
| 27080216          | 2016        | PN         | NA         | NI         | NI         | NI         | NA         | Low               |
| 27071922          | 2016        | NI         | NI         | NI         | PY         | PY         | NA         | Low               |
| 27283860          | 2016        | PN         | NA         | NI         | NI         | NI         | NA         | Low               |
| 27460442          | 2016        | PN         | NA         | NI         | NI         | NI         | NA         | Low               |

| <b>Study PMID</b> | <b>Year</b> | <b>4.1</b> | <b>4.2</b> | <b>4.3</b> | <b>4.4</b> | <b>4.5</b> | <b>4.6</b> | <b>Bias level</b> |
|-------------------|-------------|------------|------------|------------|------------|------------|------------|-------------------|
| 27470608          | 2016        | NI         | NA         | NI         | PY         | PY         | NA         | Low               |
| 27480103          | 2016        | N          | NA         | NI         | NI         | NI         | NA         | Low               |
| 28151720          | 2017        | PN         | NA         | NI         | NI         | NI         | NA         | Low               |
| 28152546          | 2017        | NI         | NI         | NI         | PY         | Y          | NA         | Low               |
| 27993793          | 2017        | PN         | NA         | NI         | NI         | NI         | NA         | Low               |
| 28284557          | 2017        | N          | NA         | NI         | NI         | NI         | NA         | Low               |
| 28444112          | 2017        | N          | NA         | NI         | NI         | NI         | NA         | Low               |
| 28268064          | 2017        | PN         | NA         | NI         | NI         | NI         | NA         | Low               |
| 28501764          | 2017        | NI         | NA         | NI         | Y          | Y          | NA         | Low               |
| 28592387          | 2017        | PN         | NA         | NI         | NI         | NI         | NA         | Low               |
| 28567600          | 2017        | NI         | NA         | NI         | PY         | PY         | NA         | Low               |
| 28611198          | 2017        | NI         | NI         | NI         | PY         | Y          | NA         | Low               |
| 28475671          | 2017        | NI         | NA         | NI         | PY         | PY         | NA         | Low               |
| 28891408          | 2017        | N          | NA         | NI         | NI         | NI         | NA         | Low               |
| 28919011          | 2017        | PN         | NA         | NI         | NI         | NI         | NA         | Low               |
| 28963614          | 2017        | NI         | NA         | NI         | PY         | PY         | NA         | Low               |
| 29285228          | 2017        | PN         | NA         | PY         | PY         | PY         | NA         | Low               |
| 29076950          | 2017        | PN         | NA         | NI         | NI         | NI         | NA         | Low               |
| 29384960          | 2017        | NI         | NA         | NI         | PY         | PY         | NA         | Low               |
| 29121415          | 2017        | PN         | NA         | NI         | NI         | NI         | NA         | Low               |
| 29477665          | 2018        | N          | NA         | NI         | NI         | NI         | NA         | Low               |
| 29188284          | 2018        | PN         | NA         | NI         | NI         | NI         | NA         | Low               |
| 29573941          | 2018        | N          | NA         | NI         | NI         | NI         | NA         | Low               |
| 29724167          | 2018        | NI         | NI         | NI         | PY         | Y          | NA         | Low               |
| 29785570          | 2018        | NI         | NI         | NI         | PY         | Y          | NA         | Low               |
| 30219628          | 2018        | N          | NA         | NI         | NI         | NI         | NA         | Low               |
| 30081673          | 2018        | NI         | NA         | NI         | Y          | Y          | NA         | Low               |
| 29438093          | 2018        | NI         | NA         | NI         | PY         | Y          | NA         | Low               |
| 30343620          | 2018        | N          | NA         | NI         | NI         | NI         | NA         | Low               |
| 30351999          | 2018        | PN         | NA         | NI         | NI         | NI         | NA         | Low               |
| 30468696          | 2019        | NI         | NA         | NI         | Y          | Y          | NA         | Low               |
| 30580112          | 2019        | NI         | NA         | NI         | NI         | Y          | NA         | Low               |
| 30690294          | 2019        | N          | NA         | NI         | NI         | NI         | NA         | Low               |
| 31171444          | 2019        | PN         | NA         | NI         | NI         | NI         | NA         | Low               |
| 32914022          | 2019        | PN         | NA         | NI         | NI         | NI         | NA         | Low               |
| 31437754          | 2019        | NI         | NA         | NI         | Y          | Y          | NA         | Low               |
| 31732523          | 2019        | NI         | NI         | NI         | PY         | Y          | NA         | Low               |
| 30386910          | 2019        | NI         | NA         | NI         | PY         | PY         | NA         | Low               |
| 31876308          | 2019        | NI         | NA         | NI         | PY         | PY         | NA         | Low               |
| 31901705          | 2020        | N          | NA         | NI         | NI         | NI         | NA         | Low               |
| 32234665          | 2020        | PN         | NA         | NI         | NI         | NI         | NA         | Low               |
| 31895752          | 2020        | PN         | NA         | NI         | NI         | NI         | NA         | Low               |

| <b>Study PMID</b> | <b>Year</b> | <b>4.1</b> | <b>4.2</b> | <b>4.3</b> | <b>4.4</b> | <b>4.5</b> | <b>4.6</b> | <b>Bias level</b> |
|-------------------|-------------|------------|------------|------------|------------|------------|------------|-------------------|
| 32534242          | 2020        | PN         | NA         | NI         | NI         | NI         | NA         | Low               |
| 32534646          | 2020        | PN         | NA         | NI         | NI         | NI         | NA         | Low               |
| 32818466          | 2020        | PN         | NA         | NI         | NI         | NI         | NA         | Low               |
| 32822286          | 2020        | N          | NA         | NI         | NI         | NI         | NA         | Low               |
| 33020646          | 2020        | PN         | NA         | NI         | NI         | NI         | NA         | Low               |
| 32758030          | 2020        | PN         | NA         | NI         | NI         | NI         | NA         | Low               |
| 32875931          | 2020        | PN         | NA         | NI         | NI         | NI         | NA         | Low               |
| 32699976          | 2020        | NI         | NA         | NI         | Y          | Y          | NA         | Low               |
| 33361337          | 2020        | PN         | NA         | NI         | NI         | NI         | NA         | Low               |
| 33637626          | 2021        | PN         | NA         | NI         | NI         | NI         | NA         | Low               |
| 34455067          | 2021        | PN         | NA         | NI         | NI         | NI         | NA         | Low               |
| 34243078          | 2021        | N          | NA         | NI         | NI         | NI         | NA         | Low               |
| 34158360          | 2021        | N          | NA         | NI         | NI         | NI         | NA         | Low               |



**BIAS DUE TO MISSING DATA**

| <b>Study PMID</b> | <b>Year</b> | <b>5.1</b> | <b>5.2</b> | <b>5.3</b> | <b>5.4</b> | <b>5.5</b> | <b>Bias level</b> |
|-------------------|-------------|------------|------------|------------|------------|------------|-------------------|
| 21639808          | 2011        | PY         | PN         | PN         | NA         | NA         | Low               |
| 22356324          | 2012        | PY         | PN         | Y          | NA         | Y          | Low               |
| 22663011          | 2012        | Y          | N          | N          | NA         | NA         | Low               |
| 22735384          | 2012        | Y          | N          | N          | NA         | NA         | Low               |
| 23051966          | 2012        | Y          | N          | N          | NA         | NA         | Low               |
| 22805291          | 2012        | Y          | PN         | PN         | NA         | NA         | Low               |
| 23020132          | 2012        | Y          | N          | N          | NA         | NA         | Low               |
| 22805292          | 2012        | Y          | PN         | PN         | NA         | NA         | Low               |
| 23248257          | 2013        | Y          | PN         | PN         | NA         | NA         | Low               |
| 23406731          | 2013        | NI         | NI         | NI         | NA         | NA         | Low               |
| 23414587          | 2013        | PY         | PN         | PN         | NA         | NA         | Low               |
| 23918947          | 2013        | PY         | PN         | PN         | NA         | NA         | Low               |
| 24295639          | 2014        | Y          | N          | N          | NA         | NA         | Low               |
| 24445759          | 2014        | PY         | PN         | Y          | NA         | Y          | Low               |
| 24508103          | 2014        | Y          | N          | N          | NA         | NA         | Low               |
| 24241686          | 2014        | Y          | PN         | PN         | NA         | NA         | Low               |
| 24582505          | 2014        | PY         | PN         | PN         | NA         | NA         | Low               |
| 25037139          | 2014        | Y          | PN         | PN         | NA         | NA         | Low               |
| 25265492          | 2014        | Y          | N          | N          | NA         | NA         | Low               |
| 25265494          | 2014        | Y          | N          | N          | NA         | NA         | Low               |
| 25287827          | 2014        | Y          | PN         | PN         | NA         | NA         | Low               |
| 25399551          | 2015        | Y          | N          | N          | NA         | NA         | Low               |
| 24661317          | 2015        | PY         | PN         | PN         | NA         | NA         | Low               |
| 25952781          | 2015        | PY         | PN         | PN         | NA         | NA         | Low               |
| 26557775          | 2015        | PY         | PN         | PN         | NA         | NA         | Low               |
| 25722381          | 2015        | PY         | PY         | NI         | Y          | PN         | Low               |
| 25956405          | 2015        | Y          | PN         | PN         | NA         | NA         | Low               |
| 26037941          | 2015        | PY         | PN         | PN         | NA         | NA         | Low               |
| 26287849          | 2015        | PY         | PN         | NI         | NA         | NA         | Low               |
| 26352686          | 2015        | PY         | PN         | PN         | NA         | NA         | Low               |
| 26392102          | 2015        | Y          | PN         | NI         | NA         | NA         | Low               |
| 26109403          | 2015        | PY         | N          | PN         | NA         | NA         | Low               |
| 26460303          | 2015        | PY         | PN         | PN         | NA         | NA         | Low               |
| 26208946          | 2016        | N          | PN         | N          | NI         | PY         | Low               |
| 26981153          | 2016        | Y          | N          | PN         | NA         | NA         | Low               |
| 26983408          | 2016        | PY         | PN         | PN         | NA         | NA         | Low               |
| 27080216          | 2016        | PY         | PN         | PN         | NA         | NA         | Low               |
| 27071922          | 2016        | Y          | N          | N          | NA         | NA         | Low               |
| 27283860          | 2016        | PY         | PN         | PN         | NA         | NA         | Low               |
| 27460442          | 2016        | PY         | PN         | PN         | NA         | NA         | Low               |
| 27470608          | 2016        | Y          | PN         | PN         | NA         | NA         | Low               |

| <b>Study PMID</b> | <b>Year</b> | <b>5.1</b> | <b>5.2</b> | <b>5.3</b> | <b>5.4</b> | <b>5.5</b> | <b>Bias level</b> |
|-------------------|-------------|------------|------------|------------|------------|------------|-------------------|
| 27480103          | 2016        | Y          | N          | N          | NA         | NA         | Low               |
| 28151720          | 2017        | PY         | PN         | PN         | NA         | NA         | Low               |
| 28152546          | 2017        | Y          | PN         | PN         | NA         | NA         | Low               |
| 27993793          | 2017        | PY         | PN         | PN         | NA         | NA         | Low               |
| 28284557          | 2017        | PY         | PN         | PN         | NA         | NA         | Low               |
| 28444112          | 2017        | PY         | PN         | PN         | NA         | NA         | Low               |
| 28268064          | 2017        | PY         | PN         | PN         | NA         | NA         | Low               |
| 28501764          | 2017        | NI         | NI         | NI         | NA         | NA         | Low               |
| 28592387          | 2017        | PY         | PN         | PN         | NA         | NA         | Low               |
| 28567600          | 2017        | Y          | PN         | PN         | NA         | NA         | Low               |
| 28611198          | 2017        | Y          | PN         | PN         | NA         | NA         | Low               |
| 28475671          | 2017        | Y          | PN         | PN         | NA         | NA         | Low               |
| 28891408          | 2017        | PY         | PN         | PN         | NA         | NA         | Low               |
| 28919011          | 2017        | PY         | PN         | PN         | NA         | NA         | Low               |
| 28963614          | 2017        | Y          | PN         | PN         | NA         | NA         | Low               |
| 29285228          | 2017        | PY         | PN         | PN         | NA         | NA         | Low               |
| 29076950          | 2017        | PY         | PN         | PN         | NA         | NA         | Low               |
| 29384960          | 2017        | Y          | PN         | PN         | NA         | NA         | Low               |
| 29121415          | 2017        | PY         | PN         | PN         | NA         | NA         | Low               |
| 29477665          | 2018        | Y          | N          | N          | NA         | NA         | Low               |
| 29188284          | 2018        | PY         | PN         | PN         | NA         | NA         | Low               |
| 29573941          | 2018        | Y          | N          | N          | NA         | NA         | Low               |
| 29724167          | 2018        | Y          | PN         | PN         | NA         | NA         | Low               |
| 29785570          | 2018        | Y          | PN         | PN         | NA         | NA         | Low               |
| 30219628          | 2018        | Y          | N          | N          | NA         | NA         | Low               |
| 30081673          | 2018        | NI         | NI         | NI         | NA         | NA         | Low               |
| 29438093          | 2018        | Y          | PN         | PN         | NA         | NA         | Low               |
| 30343620          | 2018        | Y          | N          | N          | NA         | NA         | Low               |
| 30351999          | 2018        | PY         | PN         | PN         | NA         | NA         | Low               |
| 30468696          | 2019        | NI         | NI         | NI         | NA         | NA         | Low               |
| 30580112          | 2019        | PY         | PN         | PN         | NA         | NA         | Low               |
| 30690294          | 2019        | Y          | N          | N          | NA         | NA         | Low               |
| 31171444          | 2019        | PY         | PN         | PN         | NA         | NA         | Low               |
| 32914022          | 2019        | PY         | PN         | PN         | NA         | NA         | Low               |
| 31437754          | 2019        | NI         | NI         | NI         | NA         | NA         | Low               |
| 31732523          | 2019        | Y          | PN         | PN         | NA         | NA         | Low               |
| 30386910          | 2019        | Y          | PN         | PN         | NA         | NA         | Low               |
| 31876308          | 2019        | Y          | PN         | PN         | NA         | NA         | Low               |
| 31901705          | 2020        | Y          | N          | N          | NA         | NA         | Low               |
| 32234665          | 2020        | PY         | PN         | PN         | NA         | NA         | Low               |
| 31895752          | 2020        | PY         | PN         | PN         | NA         | NA         | Low               |
| 32534242          | 2020        | PY         | PN         | PN         | NA         | NA         | Low               |

| <b>Study PMID</b> | <b>Year</b> | <b>5.1</b> | <b>5.2</b> | <b>5.3</b> | <b>5.4</b> | <b>5.5</b> | <b>Bias level</b> |
|-------------------|-------------|------------|------------|------------|------------|------------|-------------------|
| 32534646          | 2020        | PY         | PN         | PN         | NA         | NA         | Low               |
| 32818466          | 2020        | PY         | PN         | PN         | NA         | NA         | Low               |
| 32822286          | 2020        | Y          | N          | N          | NA         | NA         | Low               |
| 33020646          | 2020        | PY         | PN         | PN         | NA         | NA         | Low               |
| 32758030          | 2020        | PY         | PN         | PN         | NA         | NA         | Low               |
| 32875931          | 2020        | NI         | NI         | NI         | NA         | NA         | Low               |
| 32699976          | 2020        | NI         | NI         | NI         | NA         | NA         | Low               |
| 33361337          | 2020        | PY         | PN         | PN         | NA         | NA         | Low               |
| 33637626          | 2021        | PY         | PN         | PN         | NA         | NA         | Low               |
| 34455067          | 2021        | PY         | PN         | PN         | NA         | NA         | Low               |
| 34243078          | 2021        | PY         | PN         | PN         | NA         | NA         | Low               |
| 34158360          | 2021        | Y          | N          | N          | NA         | NA         | Low               |

**BIAS IN MEASUREMENT OF OUTCOMES**

| <b>Study PMID</b> | <b>Year</b> | <b>6.1</b> | <b>6.2</b> | <b>6.3</b> | <b>6.4</b> | <b>Bias level</b> |
|-------------------|-------------|------------|------------|------------|------------|-------------------|
| 21639808          | 2011        | PN         | NI         | PY         | PN         | Low               |
| 22356324          | 2012        | PN         | Y          | NI         | N          | Low               |
| 22663011          | 2012        | PN         | PN         | NI         | N          | Low               |
| 22735384          | 2012        | PN         | PN         | NI         | N          | Low               |
| 23051966          | 2012        | PN         | PN         | NI         | N          | Low               |
| 22805291          | 2012        | NI         | NI         | NI         | NI         | Low               |
| 23020132          | 2012        | PN         | Y          | PY         | PN         | Low               |
| 22805292          | 2012        | NI         | NI         | NI         | NI         | Low               |
| 23248257          | 2013        | PN         | N          | Y          | N          | Low               |
| 23406731          | 2013        | PY         | Y          | Y          | PN         | Low               |
| 23414587          | 2013        | PN         | PY         | NI         | N          | Low               |
| 23918947          | 2013        | PN         | PY         | NI         | N          | Low               |
| 24295639          | 2014        | PN         | NI         | NI         | N          | Low               |
| 24445759          | 2014        | PN         | Y          | NI         | N          | Low               |
| 24508103          | 2014        | PN         | NI         | NI         | N          | Low               |
| 24241686          | 2014        | PN         | NI         | NI         | NI         | Low               |
| 24582505          | 2014        | NI         | NI         | NI         | NI         | Low               |
| 25037139          | 2014        | NI         | NI         | NI         | NI         | Low               |
| 25265492          | 2014        | PN         | Y          | PY         | PN         | Low               |
| 25265494          | 2014        | PN         | Y          | PY         | PN         | Low               |
| 25287827          | 2014        | PN         | PY         | PY         | PN         | Low               |
| 25399551          | 2015        | PN         | Y          | PY         | PN         | Low               |
| 24661317          | 2015        | N          | NI         | NI         | NI         | Low               |
| 25952781          | 2015        | PN         | NI         | NI         | NI         | Low               |
| 26557775          | 2015        | PN         | NI         | NI         | NI         | Low               |
| 25722381          | 2015        | PN         | PY         | PY         | PN         | Low               |
| 25956405          | 2015        | PN         | NI         | NI         | NI         | Low               |
| 26037941          | 2015        | N          | N          | PY         | PN         | Low               |
| 26287849          | 2015        | PN         | NI         | NI         | NI         | Low               |
| 26352686          | 2015        | PN         | PY         | NI         | N          | Low               |
| 26392102          | 2015        | PN         | PY         | PY         | PN         | Low               |
| 26109403          | 2015        | PN         | NI         | NI         | NI         | Low               |
| 26460303          | 2015        | PN         | PY         | NI         | N          | Low               |
| 26208946          | 2016        | PY         | Y          | NI         | PN         | Low               |
| 26981153          | 2016        | PN         | NI         | NI         | NI         | Low               |
| 26983408          | 2016        | PN         | PY         | PY         | PN         | Low               |
| 27080216          | 2016        | PN         | PY         | NI         | N          | Low               |
| 27071922          | 2016        | NI         | NI         | NI         | NI         | Low               |
| 27283860          | 2016        | PN         | PY         | NI         | N          | Low               |
| 27460442          | 2016        | PN         | PY         | NI         | N          | Low               |
| 27470608          | 2016        | PN         | NI         | NI         | NI         | Low               |

| <b>Study PMID</b> | <b>Year</b> | <b>6.1</b> | <b>6.2</b> | <b>6.3</b> | <b>6.4</b> | <b>Bias level</b> |
|-------------------|-------------|------------|------------|------------|------------|-------------------|
| 27480103          | 2016        | PN         | Y          | PY         | PN         | Low               |
| 28151720          | 2017        | PN         | PY         | PY         | PN         | Low               |
| 28152546          | 2017        | NI         | NI         | NI         | NI         | Low               |
| 27993793          | 2017        | PN         | PY         | NI         | N          | Low               |
| 28284557          | 2017        | PN         | NI         | PY         | PN         | Low               |
| 28444112          | 2017        | PN         | NI         | PY         | PN         | Low               |
| 28268064          | 2017        | PN         | PY         | NI         | N          | Low               |
| 28501764          | 2017        | PY         | Y          | Y          | PN         | Low               |
| 28592387          | 2017        | PN         | PY         | NI         | N          | Low               |
| 28567600          | 2017        | PN         | NI         | NI         | NI         | Low               |
| 28611198          | 2017        | NI         | NI         | NI         | NI         | Low               |
| 28475671          | 2017        | PN         | NI         | NI         | NI         | Low               |
| 28891408          | 2017        | N          | N          | PY         | PN         | Low               |
| 28919011          | 2017        | PN         | PY         | NI         | N          | Low               |
| 28963614          | 2017        | PN         | NI         | NI         | NI         | Low               |
| 29285228          | 2017        | PN         | PY         | NI         | N          | Low               |
| 29076950          | 2017        | PN         | PY         | NI         | N          | Low               |
| 29384960          | 2017        | PN         | NI         | NI         | NI         | Low               |
| 29121415          | 2017        | PN         | PY         | NI         | N          | Low               |
| 29477665          | 2018        | PN         | NI         | NI         | N          | Low               |
| 29188284          | 2018        | PN         | PY         | NI         | N          | Low               |
| 29573941          | 2018        | PN         | Y          | PY         | PN         | Low               |
| 29724167          | 2018        | NI         | NI         | NI         | NI         | Low               |
| 29785570          | 2018        | NI         | NI         | NI         | NI         | Low               |
| 30219628          | 2018        | PN         | Y          | PY         | PN         | Low               |
| 30081673          | 2018        | PY         | Y          | Y          | PN         | Low               |
| 29438093          | 2018        | PN         | NI         | NI         | NI         | Low               |
| 30343620          | 2018        | PN         | Y          | PY         | PN         | Low               |
| 30351999          | 2018        | PN         | PY         | NI         | N          | Low               |
| 30468696          | 2019        | PY         | Y          | Y          | PN         | Low               |
| 30580112          | 2019        | NI         | NI         | NI         | NI         | Low               |
| 30690294          | 2019        | PN         | Y          | PY         | PN         | Low               |
| 31171444          | 2019        | PN         | PY         | NI         | N          | Low               |
| 32914022          | 2019        | PN         | PY         | NI         | N          | Low               |
| 31437754          | 2019        | PY         | Y          | Y          | PN         | Low               |
| 31732523          | 2019        | NI         | NI         | NI         | NI         | Low               |
| 30386910          | 2019        | PN         | NI         | NI         | NI         | Low               |
| 31876308          | 2019        | PN         | NI         | NI         | NI         | Low               |
| 31901705          | 2020        | PN         | Y          | PY         | PN         | Low               |
| 32234665          | 2020        | PN         | PY         | NI         | N          | Low               |
| 31895752          | 2020        | PN         | PY         | NI         | N          | Low               |
| 32534242          | 2020        | PN         | PY         | NI         | N          | Low               |

| <b>Study PMID</b> | <b>Year</b> | <b>6.1</b> | <b>6.2</b> | <b>6.3</b> | <b>6.4</b> | <b>Bias level</b> |
|-------------------|-------------|------------|------------|------------|------------|-------------------|
| 32534646          | 2020        | PN         | NI         | NI         | N          | Low               |
| 32818466          | 2020        | PN         | PY         | NI         | N          | Low               |
| 32822286          | 2020        | PN         | NI         | NI         | N          | Low               |
| 33020646          | 2020        | PN         | PY         | NI         | N          | Low               |
| 32758030          | 2020        | PN         | PY         | NI         | N          | Low               |
| 32875931          | 2020        | PN         | PY         | NI         | N          | Low               |
| 32699976          | 2020        | PY         | Y          | Y          | PN         | Low               |
| 33361337          | 2020        | PN         | PY         | NI         | N          | Low               |
| 33637626          | 2021        | PN         | PY         | NI         | N          | Low               |
| 34455067          | 2021        | PN         | PY         | NI         | N          | Low               |
| 34243078          | 2021        | PN         | NI         | PY         | PN         | Low               |
| 34158360          | 2021        | PN         | Y          | PY         | PN         | Low               |

**BIAS IN SELECTION OF THE REPORTED RESULT**

| <b>Study PMID</b> | <b>Year</b> | <b>7.1</b> | <b>7.2</b> | <b>7.3</b> | <b>Bias level</b> |
|-------------------|-------------|------------|------------|------------|-------------------|
| 21639808          | 2011        | N          | N          | N          | Low               |
| 22356324          | 2012        | N          | N          | N          | Low               |
| 22663011          | 2012        | N          | N          | N          | Low               |
| 22735384          | 2012        | N          | N          | N          | Low               |
| 23051966          | 2012        | N          | N          | N          | Low               |
| 22805291          | 2012        | N          | N          | N          | Low               |
| 23020132          | 2012        | N          | N          | N          | Low               |
| 22805292          | 2012        | N          | N          | N          | Low               |
| 23248257          | 2013        | N          | N          | N          | Low               |
| 23406731          | 2013        | N          | NI         | N          | Low               |
| 23414587          | 2013        | N          | N          | N          | Low               |
| 23918947          | 2013        | N          | N          | N          | Low               |
| 24295639          | 2014        | N          | N          | N          | Low               |
| 24445759          | 2014        | N          | N          | N          | Low               |
| 24508103          | 2014        | N          | N          | N          | Low               |
| 24241686          | 2014        | NI         | N          | PY         | Low               |
| 24582505          | 2014        | PN         | PN         | PN         | Low               |
| 25037139          | 2014        | N          | N          | N          | Low               |
| 25265492          | 2014        | N          | N          | N          | Low               |
| 25265494          | 2014        | N          | N          | N          | Low               |
| 25287827          | 2014        | N          | N          | N          | Low               |
| 25399551          | 2015        | N          | N          | N          | Low               |
| 24661317          | 2015        | NI         | N          | PY         | Low               |
| 25952781          | 2015        | N          | PN         | N          | Low               |
| 26557775          | 2015        | NI         | N          | PY         | Low               |
| 25722381          | 2015        | N          | PN         | PN         | Low               |
| 25956405          | 2015        | NI         | N          | PY         | Low               |
| 26037941          | 2015        | N          | N          | N          | Low               |
| 26287849          | 2015        | NI         | N          | PY         | Low               |
| 26352686          | 2015        | N          | N          | N          | Low               |
| 26392102          | 2015        | N          | N          | N          | Low               |
| 26109403          | 2015        | NI         | N          | PY         | Low               |
| 26460303          | 2015        | N          | N          | N          | Low               |
| 26208946          | 2016        | Y          | PN         | N          | Low               |
| 26981153          | 2016        | NI         | N          | PY         | Low               |
| 26983408          | 2016        | N          | N          | N          | Low               |
| 27080216          | 2016        | PN         | N          | N          | Low               |
| 27071922          | 2016        | PN         | PN         | PN         | Low               |
| 27283860          | 2016        | N          | PN         | N          | Low               |
| 27460442          | 2016        | PN         | N          | N          | Low               |

| <b>Study PMID</b> | <b>Year</b> | <b>7.1</b> | <b>7.2</b> | <b>7.3</b> | <b>Bias level</b> |
|-------------------|-------------|------------|------------|------------|-------------------|
| 27470608          | 2016        | NI         | N          | PY         | Low               |
| 27480103          | 2016        | N          | N          | N          | Low               |
| 28151720          | 2017        | PN         | PN         | N          | Low               |
| 28152546          | 2017        | PN         | N          | N          | Low               |
| 27993793          | 2017        | PN         | PN         | PN         | Low               |
| 28284557          | 2017        | N          | N          | PN         | Low               |
| 28444112          | 2017        | N          | N          | N          | Low               |
| 28268064          | 2017        | PN         | N          | N          | Low               |
| 28501764          | 2017        | N          | NI         | N          | Low               |
| 28592387          | 2017        | PN         | N          | N          | Low               |
| 28567600          | 2017        | NI         | N          | PY         | Low               |
| 28611198          | 2017        | N          | N          | N          | Low               |
| 28475671          | 2017        | NI         | N          | PY         | Low               |
| 28891408          | 2017        | N          | N          | N          | Low               |
| 28919011          | 2017        | PN         | N          | N          | Low               |
| 28963614          | 2017        | NI         | N          | PY         | Low               |
| 29285228          | 2017        | PN         | PN         | N          | Low               |
| 29076950          | 2017        | PN         | PN         | N          | Low               |
| 29384960          | 2017        | NI         | N          | PY         | Low               |
| 29121415          | 2017        | PN         | N          | PN         | Low               |
| 29477665          | 2018        | N          | N          | N          | Low               |
| 29188284          | 2018        | PN         | PN         | N          | Low               |
| 29573941          | 2018        | N          | PN         | N          | Low               |
| 29724167          | 2018        | N          | N          | N          | Low               |
| 29785570          | 2018        | PN         | N          | N          | Low               |
| 30219628          | 2018        | N          | N          | N          | Low               |
| 30081673          | 2018        | N          | NI         | N          | Low               |
| 29438093          | 2018        | NI         | N          | PY         | Low               |
| 30343620          | 2018        | N          | PN         | N          | Low               |
| 30351999          | 2018        | PN         | N          | PN         | Low               |
| 30468696          | 2019        | N          | NI         | N          | Low               |
| 30580112          | 2019        | PN         | PN         | PN         | Low               |
| 30690294          | 2019        | PN         | N          | N          | Low               |
| 31171444          | 2019        | PN         | N          | PN         | Low               |
| 32914022          | 2019        | PN         | N          | PN         | Low               |
| 31437754          | 2019        | N          | NI         | N          | Low               |
| 31732523          | 2019        | N          | N          | N          | Low               |
| 30386910          | 2019        | NI         | PN         | PY         | Low               |
| 31876308          | 2019        | NI         | N          | PY         | Low               |
| 31901705          | 2020        | N          | N          | N          | Low               |
| 32234665          | 2020        | PN         | N          | N          | Low               |
| 31895752          | 2020        | PN         | PN         | PN         | Low               |



| <b>Study PMID</b> | <b>Year</b> | <b>7.1</b> | <b>7.2</b> | <b>7.3</b> | <b>Bias level</b> |
|-------------------|-------------|------------|------------|------------|-------------------|
| 32534242          | 2020        | PN         | N          | N          | Low               |
| 32534646          | 2020        | PN         | N          | N          | Low               |
| 32818466          | 2020        | PN         | N          | N          | Low               |
| 32822286          | 2020        | N          | N          | N          | Low               |
| 33020646          | 2020        | PN         | PN         | N          | Low               |
| 32758030          | 2020        | PN         | N          | PN         | Low               |
| 32875931          | 2020        | PN         | N          | PN         | Low               |
| 32699976          | 2020        | N          | NI         | N          | Low               |
| 33361337          | 2020        | PN         | PN         | N          | Low               |
| 33637626          | 2021        | PN         | PN         | PN         | Low               |
| 34455067          | 2021        | PN         | PN         | PN         | Low               |
| 34243078          | 2021        | N          | N          | N          | Low               |
| 34158360          | 2021        | N          | N          | N          | Low               |

Figure S1- Overall incidences of grade 5 adverse events according to treatment regimen.

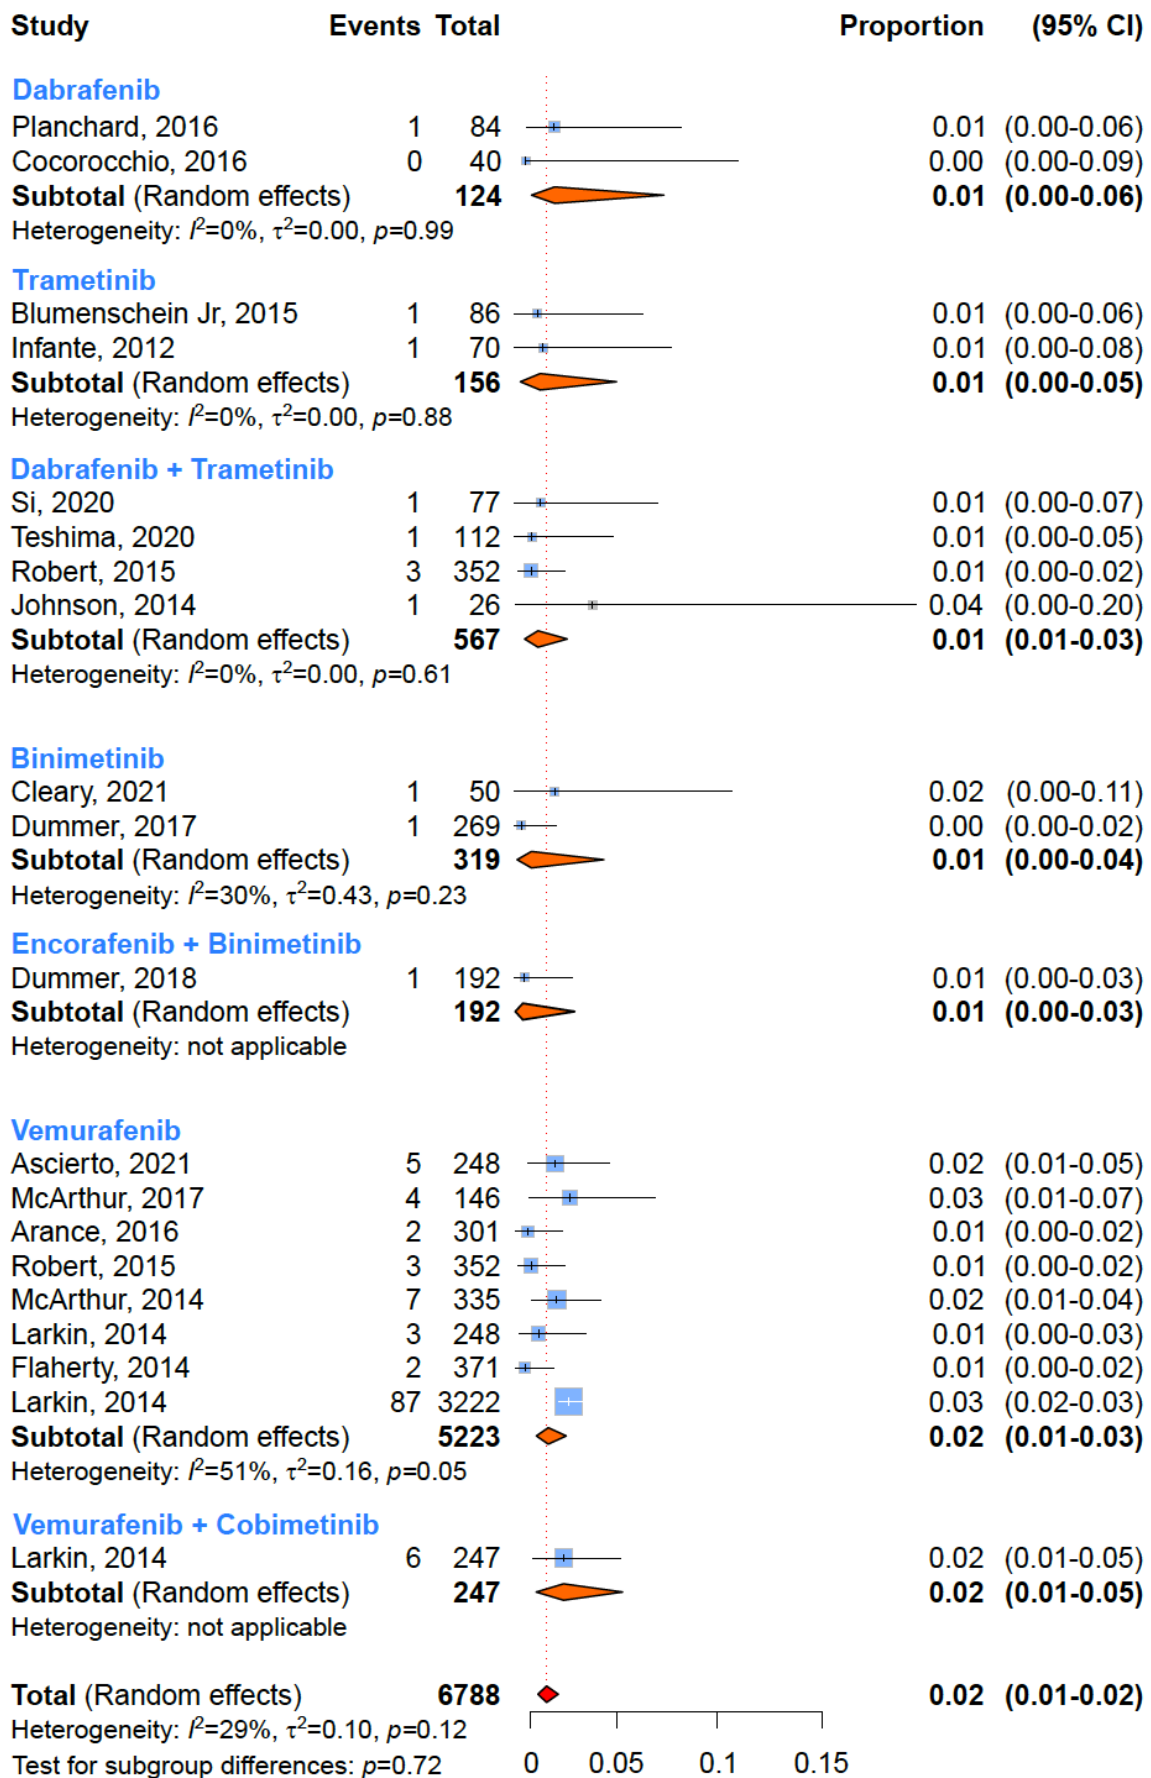

**Table S3-Adverse events grade 5**

| <b>DRUG</b>                            | <b>ADVERSE EVENT</b>                  | <b>N</b> |
|----------------------------------------|---------------------------------------|----------|
| <b>Vemurafenib</b>                     | Death                                 | 12       |
|                                        | General Physical Health Deterioration | 6        |
|                                        | Cerebral Haemorrhage                  | 6        |
|                                        | Cerebrovascular Accident              | 5        |
|                                        | Pneumonia                             | 5        |
|                                        | Intracranial Tumour Haemorrhage       | 5        |
|                                        | Pulmonary Embolism                    | 5        |
|                                        | Cardiac Arrest                        | 3        |
|                                        | Multi-Organ Failure                   | 3        |
|                                        | Sepsis                                | 3        |
|                                        | Dyspnoea                              | 3        |
|                                        | Cardiopulmonary Failure               | 2        |
|                                        | Myocardial Infarction                 | 2        |
|                                        | Respiratory Tract Infection           | 2        |
|                                        | Completed Suicide                     | 2        |
|                                        | Haemorrhagic Stroke                   | 2        |
|                                        | Cerebral Ischemia                     | 1        |
|                                        | Cardiac Failure                       | 1        |
|                                        | Chronic Fatigue Syndrome              | 1        |
|                                        | Euthanasia                            | 1        |
|                                        | Multi-Organ Disorder                  | 1        |
|                                        | Sudden Cardiac Death                  | 1        |
|                                        | Cerebral Haematoma                    | 1        |
|                                        | Convulsion                            | 1        |
|                                        | Dizziness                             | 1        |
|                                        | Haemorrhage Intracranial              | 1        |
|                                        | Hydrocephalus                         | 1        |
|                                        | Intracranial Pressure Increase        | 1        |
|                                        | Ischaemic Stroke                      | 1        |
|                                        | Acute Respiratory Distress Syndrome   | 1        |
|                                        | Acute Respiratory Failure             | 1        |
|                                        | Chronic Obstructive Pulmonary Disease | 1        |
|                                        | Pulmonary Oedema                      | 1        |
|                                        | Pulmonary Toxicity                    | 1        |
|                                        | Respiratory Failure                   | 1        |
|                                        | Acute Myocardial Infarction           | 1        |
|                                        | Cardiogenic Stroke                    | 1        |
|                                        | Coronary Artery Disease 2             | 1        |
|                                        | Torsade De Pointes                    | 1        |
|                                        | Escherichia Sepsis                    | 1        |
|                                        | Septic Shock                          | 1        |
| Soft Tissue Infection                  | 1                                     |          |
| Pneumocystis Jiroveci Pneumonia        | 1                                     |          |
| Anemia                                 | 1                                     |          |
| Agranulocytosis                        | 1                                     |          |
| Disseminated Intravascular Coagulation | 1                                     |          |
| Thrombocytopenia                       | 1                                     |          |
| Fall                                   | 1                                     |          |

|                                  |                                      |   |
|----------------------------------|--------------------------------------|---|
|                                  | Injury                               | 1 |
|                                  | Multiple Injuries                    | 1 |
|                                  | Poisoning                            | 1 |
|                                  | Diverticular Perforation             | 1 |
|                                  | Gastrointestinal Necrosis            | 1 |
|                                  | Intra-Abdominal Haemorrhage          | 1 |
|                                  | Circulatory Collapse                 | 1 |
|                                  | Extremity Necrosis                   | 1 |
|                                  | Atelectasis                          | 1 |
|                                  | Renal Colic                          | 1 |
|                                  | Toxic Epidermal Necrolysis           | 1 |
|                                  | Metastases To Central Nervous System | 1 |
|                                  | Aortic Aneurysm Rupture              | 1 |
|                                  | Pleural Infection                    | 1 |
|                                  | Glioma                               | 1 |
|                                  | No information                       | 5 |
| <b>Dabrafenib</b>                | Intracranial Haemorrhage             | 1 |
| <b>Trametinib</b>                | Sudden Death                         | 1 |
|                                  | No Information                       | 1 |
| <b>Binimetinib</b>               | Multi-Organ Failure                  | 1 |
|                                  | No information                       | 1 |
| <b>Vemurafenib + Cobimetinib</b> | Cardiac Arrest                       | 1 |
|                                  | Coma                                 | 1 |
|                                  | Clostridium Difficile Colitis        | 1 |
|                                  | Myocardial Infarction                | 1 |
|                                  | Pneumonia                            | 1 |
|                                  | No information                       | 1 |
| <b>Dabrafenib + Trametinib</b>   | Cerebral Haemorrhage                 | 2 |
|                                  | Brain Stem Haemorrhage               | 1 |
|                                  | Pneumoperitoneum                     | 1 |
|                                  | Disease Progression                  | 1 |
|                                  | Hyponatremia                         | 1 |
|                                  | Neurological decompensation          | 1 |
| <b>Encorafenib + Binimetinib</b> | Suicide                              | 1 |
